# Supplementary material
Source: publisher figshare collection journal article supplement (https://sage.figshare.com/ndownloader/files/21943728)
Supplement: Supplementary file 1 [file 21943728]

## Sheet: Sheet1
Table S1: The distribution of genes in each chromosomes of S.pimpinellifolium and S. lycopersicum.
Chromosome	Solanum pimpinellifolium	Solanum Lycopersicum
0	Sopim00g102400.0.1	Solyc00g102400.2.1
	Sopim00g294230.0.1	Solyc00g294230.1.1
1	Sopim01g008800.0.1	Solyc01g008800.1.1
	Sopim01g014840.0.1	Solyc01g014840.2.1
	Sopim01g016960.0.1	Solyc01g016960.1.1
	Sopim01g017690.0.1	Solyc01g017690.1.1
	Sopim01g087200.0.1	Solyc01g066020.1.1
	Sopim01g088060.0.1	Solyc01g086810.2.1
	Sopim01g090430.0.1	Solyc01g087200.2.1
	Sopim01g113620.0.1	Solyc01g088060.2.1
	Sopim01g102840.0.1	Solyc01g090430.2.1
	Sopim01g102880.0.1	Solyc01g113620.1.1
	Sopim01g102920.0.1	Solyc01g102840.2.1
	Sopim01g103610.0.1	Solyc01g102850.1.1
	Sopim01g106410.0.1	Solyc01g102880.1.1
		Solyc01g102920.2.1
		Solyc01g103610.2.1
		Solyc01g106410.1.1
2	Sopim02g027080.0.1	Solyc02g027080.1.1
	Sopim02g030290.0.1	Solyc02g030290.1.1
	Sopim02g032240.0.1	Solyc02g032240.1.1
	Sopim02g032650.0.1	Solyc02g032650.2.1
	Sopim02g036270.0.1	Solyc02g036270.2.1
	Sopim02g037540.0.1	Solyc02g037540.1.1
	Sopim02g070370.0.1	Solyc02g070370.2.1
	Sopim02g070410.0.1	Solyc02g070410.1.1
	Sopim02g070730.0.1	Solyc02g070730.1.1
	Sopim02g082050.0.1	Solyc02g070750.1.1
	Sopim02g084450.0.1	Solyc02g082050.2.1
	Sopim02g084890.0.1	Solyc02g084450.2.1
	Sopim02g090380.0.1	Solyc02g084890.1.1
		Solyc02g090380.2.1
3	Sopim03g005650.0.1	Solyc03g005650.1.1
	Sopim03g005660.0.1	Solyc03g005660.2.1
	Sopim03g005670.0.1	Solyc03g005670.2.1
	Sopim03g006750.0.1	Solyc03g006750.1.1
	Sopim03g053070.0.1	Solyc03g053070.1.1
	Sopim03g078300.0.1	Solyc03g078300.1.1
	Sopim03g094100.0.1	Solyc03g094100.1.1
4	Sopim04g005540.0.1	Solyc04g005540.2.1
	Sopim04g005550.0.1	Solyc04g005550.1.1
	Sopim04g007030.0.1	Solyc04g007030.2.1
	Sopim04g007050.0.1	Solyc04g007050.2.1
	Sopim04g007060.0.1	Solyc04g007060.2.1
	Sopim04g007070.0.1	Solyc04g007070.2.1
	Sopim04g007320.0.1	Solyc04g007320.1.1
	Sopim04g007490.0.1	Solyc04g007490.2.1
	Sopim04g008120.0.1	Solyc04g008120.1.1
	Sopim04g008140.0.1	Solyc04g008130.1.1
	Sopim04g008160.0.1	Solyc04g008140.1.1
	Sopim04g008170.0.1	Solyc04g008160.1.1
	Sopim04g008180.0.1	Solyc04g008170.1.1
	Sopim04g008190.0.1	Solyc04g008180.1.1
	Sopim04g008200.0.1	Solyc04g008190.1.1
	Sopim04g009070.0.1	Solyc04g008200.2.1
	Sopim04g009080.0.1	Solyc04g009070.1.1
	Sopim04g009090.0.1	Solyc04g009080.1.1
	Sopim04g009100.0.1	Solyc04g009090.1.1
	Sopim04g009110.0.1	Solyc04g009100.1.1
	Sopim04g009120.0.1	Solyc04g009110.1.1
	Sopim04g009130.0.1	Solyc04g009120.1.1
	Sopim04g009150.0.1	Solyc04g009130.2.1
	Sopim04g009240.0.1	Solyc04g009150.1.1
	Sopim04g009250.0.1	Solyc04g009240.1.1
	Sopim04g009260.0.1	Solyc04g009250.1.1
	Sopim04g009270.0.1	Solyc04g009260.1.1
	Sopim04g009290.0.1	Solyc04g009270.2.1
	Sopim04g009660.0.1	Solyc04g009290.1.1
	Sopim04g009690.0.1	Solyc04g009660.2.1
	Sopim04g011890.0.1	Solyc04g009690.1.1
	Sopim04g011960.0.1	Solyc04g011890.1.1
	Sopim04g011980.0.1	Solyc04g011960.1.1
	Sopim04g011990.0.1	Solyc04g011980.1.1
	Sopim04g012000.0.1	Solyc04g011990.1.1
	Sopim04g012010.0.1	Solyc04g012000.1.1
	Sopim04g015210.0.1	Solyc04g012010.2.1
	Sopim04g015220.0.1	Solyc04g015210.2.1
	Sopim04g015240.0.1	Solyc04g015220.2.1
	Sopim04g015630.0.1	Solyc04g015240.1.1
	Sopim04g015640.0.1	Solyc04g015630.2.1
	Solyc04g025580.0.1	Solyc04g015640.1.1
	Sopim04g025820.0.1	Solyc04g025580.1.1
	Sopim04g025840.0.1	Solyc04g025820.1.1
	Sopim04g025850.0.1	Solyc04g025840.1.1
	Sopim04g026110.0.1	Solyc04g025850.1.1
	Sopim04g039990.0.1	Solyc04g026110.2.1
	Sopim04g048910.0.1	Solyc04g039990.2.1
	Sopim04g048920.0.1	Solyc04g048910.1.1
	Sopim04g051210.0.1	Solyc04g048920.1.1
	Sopim04g056570.0.1	Solyc04g051210.1.1
	Sopim04g079420.0.1	Solyc04g056570.2.1
		Solyc04g079420.2.1
5	Sopim05g005330.0.1	Solyc05g005130.1.1
	Sopim05g006620.0.1	Solyc05g005330.2.1
	Sopim05g007170.0.1	Solyc05g006620.2.1
	Sopim05g007350.0.1	Solyc05g006630.2.1
	Sopim05g007610.0.1	Solyc05g007170.2.1
	Sopim05g007630.0.1	Solyc05g007350.1.1
	Sopim05g007640.0.1	Solyc05g007610.2.1
	Sopim05g007850.0.1	Solyc05g007630.2.1
	Sopim05g008070.0.1	Solyc05g007640.2.1
	Sopim05g008650.0.1	Solyc05g007850.1.1
	Sopim05g008690.0.1	Solyc05g008070.2.1
	Sopim05g009740.0.1	Solyc05g008650.1.1
	Sopim05g009750.0.1	Solyc05g008690.1.1
	Sopim05g009760.0.1	Solyc05g009740.1.1
	Sopim05g012740.0.1	Solyc05g009750.1.1
	Sopim05g012890.0.1	Solyc05g009760.1.1
	Sopim05g012910.0.1	Solyc05g012740.1.1
	Sopim05g013260.0.1	Solyc05g012890.1.1
	Sopim05g013280.0.1	Solyc05g012910.2.1
	Sopim05g018010.0.1	Solyc05g013260.1.1
	Sopim05g018710.0.1	Solyc05g013280.2.1
	Sopim05g018720.0.1	Solyc05g018010.1.1
	Sopim05g024370.0.1	Solyc05g018710.1.1
	Sopim05g042090.0.1	Solyc05g021140.1.1
	Sopim05g043420.0.1	Solyc05g024370.1.1
	Sopim05g044490.0.1	Solyc05g042090.1.1
	Sopim05g047700.0.1	Solyc05g043420.1.1
	Sopim05g053990.0.1	Solyc05g044490.2.1
	Sopim05g054010.0.1	Solyc05g047700.1.1
	Sopim05g054020.0.1	Solyc05g050430.1.1
	Sopim05g054340.0.1	Solyc05g053990.2.1
		Solyc05g054010.2.1
		Solyc05g054020.1.1
		Solyc05g054340.2.1
6	Sopim06g008380.0.1	Solyc06g008380.1.1
	Sopim06g008400.0.1	Solyc06g008400.1.1
	Sopim06g008450.0.1	Solyc06g008450.2.1
	Sopim06g008480.0.1	Solyc06g008480.1.1
	Sopim06g008770.0.1	Solyc06g008770.1.1
	Sopim06g008790.0.1	Solyc06g008790.2.1
	Sopim06g008800.0.1	Solyc06g008800.1.1
	Sopim06g048910.0.1	Solyc06g048910.1.1
	Sopim06g062440.0.1	Solyc06g062440.2.1
	Sopim06g064680.0.1	Solyc06g064680.1.1
	Sopim06g064690.0.1	Solyc06g064690.1.1
	Sopim06g064720.0.1	Solyc06g064720.1.1
	Sopim06g064750.0.1	Solyc06g064750.1.1
	Sopim06g064760.0.1	Solyc06g064760.1.1
	Sopim06g064780.0.1	Solyc06g064780.1.1
	Sopim06g065000.0.1	Solyc06g065000.1.1
7	Sopim07g005770.1.1	Solyc07g005770.2.1
	Sopim07g009180.0.1	Solyc07g009180.1.1
	Sopim07g009190.0.1	Solyc07g009190.1.1
	Sopim07g015900.0.1	Solyc07g039390.1.1
	Sopim07g039390.0.1	Solyc07g039400.1.1
	Sopim07g039400.0.1	Solyc07g039410.2.1
	Sopim07g039410.0.1	Solyc07g039420.1.1
	Sopim07g039420.0.1	Solyc07g039440.1.1
	Sopim07g039440.0.1	Solyc07g044800.2.1
	Sopim07g044800.0.1	Solyc07g049700.1.1
	Sopim07g049700.0.1	Solyc07g052770.2.1
	Sopim07g052770.0.1	Solyc07g052790.1.1
	Sopim07g052790.0.1	Solyc07g052800.1.1
	Sopim07g052800.0.1	Solyc07g053010.1.1
	Sopim07g053010.0.1	Solyc07g053020.1.1
	Sopim07g053020.0.1	Solyc07g055380.1.1
	Sopim07g055380.0.1	Solyc07g055610.1.1
	Sopim07g055610.0.1
	Sopim07g066180.0.1
8	Sopim08g005440.0.1	Solyc08g005440.2.1
	Sopim08g005500.0.1	Solyc08g005500.2.1
	Sopim08g005510.0.1	Solyc08g005510.1.1
	Sopim08g007250.0.1	Solyc08g007250.1.1
	Sopim08g007630.0.1	Solyc08g007630.1.1
	Sopim08g013970.0.1	Solyc08g013970.1.1
	Sopim08g074250.0.1	Solyc08g074250.1.1
	Sopim08g075630.0.1	Solyc08g075630.2.1
	Sopim08g075640.0.1	Solyc08g075640.2.1
	Sopim08g075980.0.1	Solyc08g076000.2.1
	Sopim08g076000.0.1
9	Sopim09g005290.0.1	Solyc09g005290.1.1
	Sopim09g007710.0.1	Solyc09g007710.2.1
	Sopim09g018220.0.1	Solyc09g018220.1.1
	Sopim09g059830.0.1	Solyc09g059830.1.1
	Sopim09g063040.0.1	Solyc09g063040.1.1
	Sopim09g064610.0.1	Solyc09g064610.2.1
	Sopim09g064690.0.1	Solyc09g064680.1.1
	Sopim09g072940.0.1	Solyc09g064690.1.1
	Sopim09g064680.0.1	Solyc09g072940.1.1
	Sopim09g092280.0.1	Solyc09g092280.1.1
	Sopim09g092290.0.1	Solyc09g092290.1.1
	Sopim09g092300.0.1	Solyc09g092300.2.1
	Sopim09g092310.0.1	Solyc09g092310.1.1
	Sopim09g092410.0.1	Solyc09g092410.2.1
	Sopim09g098100.0.1	Solyc09g098100.2.1
	Sopim09g098130.0.1	Solyc09g098130.1.1
	Sopim09g098210.0.1	Solyc09g098210.1.1
10	Sopim10g008220.0.1	Solyc10g008220.2.1
	Sopim10g008230.0.1	Solyc10g008230.1.1
	Sopim10g008240.0.1	Solyc10g008240.2.1
	Sopim10g012290.0.1	Solyc10g012350.1.1
	Sopim10g012350.0.1	Solyc10g047320.1.1
	Sopim10g047320.0.1	Solyc10g050050.1.1
	Sopim10g051050.0.1	Solyc10g050740.1.1
	Sopim10g054600.0.1	Solyc10g051050.1.1
	Sopim10g054940.0.1	Solyc10g054600.1.1
	Sopim10g054970.0.1	Solyc10g054940.1.1
	Sopim10g055050.0.1	Solyc10g054970.1.1
	Sopim10g055080.0.1	Solyc10g055050.1.1
	Sopim10g055120.0.1	Solyc10g055080.1.1
	Sopim10g055140.0.1	Solyc10g055120.1.1
	Sopim10g055170.0.1	Solyc10g055140.1.1
	Sopim10g074640.0.1	Solyc10g055170.1.1
	Sopim10g076440.0.1	Solyc10g074640.1.1
	Sopim10g085460.0.1	Solyc10g076440.1.1
	Sopim10g085780.0.1	Solyc10g085460.1.1
		Solyc10g085780.1.1
		Solyc10g086590.1.1
11	Sopim11g006520.0.1	Solyc11g006520.1.1
	Sopim11g006530.0.1	Solyc11g006530.1.1
	Sopim11g006630.0.1	Solyc11g006630.1.1
	Sopim11g006640.0.1	Solyc11g006640.1.1
	Sopim11g007790.0.1	Solyc11g007790.1.1
	Sopim11g010160.0.1	Solyc11g010160.1.1
	Sopim11g011080.0.1	Solyc11g011080.1.1
	Sopim11g011090.0.1	Solyc11g011090.1.1
	Sopim11g011350.0.1	Solyc11g011350.1.1
	Sopim11g020080.0.1	Solyc11g020080.1.1
	Sopim11g020090.0.1	Solyc11g020090.1.1
	Sopim11g020100.0.1	Solyc11g020100.1.1
	Sopim11g042730.0.1	Solyc11g043070.1.1
	Sopim11g043070.0.1	Solyc11g043100.1.1
	Sopim11g043100.0.1	Solyc11g062150.1.1
	Sopim11g062150.0.1	Solyc11g064770.1.1
	Sopim11g064770.0.1	Solyc11g065780.1.1
	Sopim11g065780.0.1	Solyc11g065790.1.1
	Sopim11g065790.0.1	Solyc11g068360.1.1
	Sopim11g068360.0.1	Solyc11g069020.1.1
	Sopim11g069020.0.1	Solyc11g069620.1.1
	Sopim11g069620.0.1	Solyc11g069660.1.1
	Sopim11g069660.0.1	Solyc11g069920.1.1
	Sopim11g069920.0.1	Solyc11g069990.1.1
	Sopim11g069990.0.1	Solyc11g070000.1.1
	Sopim11g070000.0.1	Solyc11g071420.1.1
	Sopim11g071420.0.1	Solyc11g071430.1.1
	Sopim11g071430.0.1
12	Sopim12g005520.0.1	Solyc12g005520.1.1
	Sopim12g005530.0.1	Solyc12g005530.1.1
	Sopim12g005970.0.1	Solyc12g005970.1.1
	Sopim12g006040.0.1	Solyc12g006040.1.1
	Sopim12g009450.0.1	Solyc12g009450.1.1
	Sopim12g009460.0.1	Solyc12g009460.1.1
	Sopim12g010660.0.1	Solyc12g010660.1.1
	Sopim12g016220.0.1	Solyc12g016220.1.1
	Sopim12g017730.0.1	Solyc12g017730.1.1
	Sopim12g038900.0.1	Solyc12g017800.1.1
	Sopim12g044180.0.1	Solyc12g038900.1.1
	Sopim12g044190.0.1	Solyc12g044180.1.1
	Sopim12g044200.0.1	Solyc12g044190.1.1
	Sopim12g094660.0.1	Solyc12g044200.1.1
	Sopim12g096920.0.1	Solyc12g094660.1.1
	Sopim12g097020.0.1	Solyc12g096920.1.1
	Sopim12g099060.0.1	Solyc12g097020.1.1
		Solyc12g099060.1.1
Altered genes are marked by red and green colors in S.pimpinellifolium and S. Lycopersicum, respectively.
